# Supplementary material for: Absence of W Chromosome in Psychidae Moths and Implications for the Theory of Sex Chromosome Evolution in Lepidoptera
Source: MDPI journal article supplement (doi:10.3390/genes10121016), 2019-12-05
Supplement: s1 [file s1]

Table S1. Available information on chromosome numbers and sex chromosomes in Psychidae.

| Species                                                           | Subfamily    | Reproduction mode         | 2n<br>(♀/♂)    | Sex chromosomes                        | Available data                                                                                                                   | References          |
|-------------------------------------------------------------------|--------------|---------------------------|----------------|----------------------------------------|----------------------------------------------------------------------------------------------------------------------------------|---------------------|
| <i>Taleporia tubulosa</i>                                         | Taleporiinae | sexual                    | 59/60          | Z0/ZZ                                  | - Z univalent in female pachytene<br>- absence of sex chromatin<br>- female genome smaller than male genome                      | [14];<br>this study |
| <i>Dahlica triquetrella</i><br>syn. <i>Solenobia triquetrella</i> | Naryciinae   | sexual or parthenogenetic | 61/62 or 62/62 | females Z0 and WZ, males ZZ, WZZ, WWZZ | - individuals with and without W do not differ in phenotype<br>- W suggested to be a B chromosome in Robinson [39]               | [18,36,37,45]       |
| <i>Diplodoma laichartingella</i>                                  | Naryciinae   | sexual                    | n.d.           | Z0/ZZ                                  | - Z univalent in female pachytene<br>- absence of sex chromatin                                                                  | this study          |
| <i>Psyche casta</i><br>syn. <i>Fumea casta</i>                    | Psychinae    | sexual                    | 63/64          | probably Z0/ZZ                         | - 31 elements in female metaphase I (probably 30 bivalents, one univalent)<br>- daughter plates have either 30 or 31 chromosomes | [14]                |
| <i>Luffia ferchaultella</i>                                       | Psychinae    | parthenogenetic           | 61<br>(♀ only) | probably Z0                            | - 30 bivalents and a single chromosome, probably Z, in female metaphase I<br>- Z called X in the paper                           | [17,36,46]          |
| <i>Luffia lapidella</i>                                           | Psychinae    | sexual                    | 61/62          | probably Z0/ZZ                         | - odd chromosome number in females                                                                                               | [47]                |
| <i>Proutia betulina</i>                                           | Psychinae    | sexual                    | 61/62          | Z0/ZZ                                  | - Z univalent in female pachytene<br>- absence of sex chromatin<br>- female genome smaller than male genome                      | this study          |
| <i>Apterona helix</i>                                             | Oiketicinae  | sexual or parthenogenetic | 61-62          | probably Z0/ZZ                         | - chromosome counts in original publication range from 61-62<br>- probably misinterpreted in Robinson [39]                       | [18,36,48]          |
